# Supplementary material
Source: PubMed Central journal article supplement (PMC3571392)
Supplement: JVI.02676-12_zjv999097328so6.pdf [file JVI.02676-12_zjv999097328so6.pdf]

1 **Supplemental Data**

2

3 **Herpesvirus tegument protein pUL37 interacts with dystonin/BPAG1 to promote capsid**  
4 **transport on microtubules during egress**

5 David Padeloup, Marion McElwee, Frauke Beilstein, Marc Labetoulle and Frazer J. Rixon

6

7 **Supplemental Legends**

8 **Supplemental Movie S1.** Capsid trafficking of vSR27-VP26GFP in shControl HFFF2 cells at  
9 24h post-infection. HFFF2 shControl cells were infected with 1 pfu/cell of vSR27-VP26GFP  
10 at 37°C. At 24h post-infection, capsid trafficking was monitored at room temperature at 1  
11 frame/second for 60 seconds. The movie is shown at 10 frames/second. Frame is 24 µm by 31  
12 µm.

13

14 **Supplemental Movie S2.** Capsid trafficking of vSR27-VP26GFP in shDyst1 HFFF2 cells at  
15 24h post-infection. HFFF2 shDyst1 cells were infected with 1 pfu/cell of vSR27-VP26GFP at  
16 37°C. 24h post-infection, capsid trafficking was monitored at room temperature at 1  
17 frame/second for 60 seconds. The movie is shown at 10 frames/second. Frame is 30 µm by 23  
18 µm.

19

20 **Supplemental Movie S3.** Capsid trafficking of vSR27-VP26GFP in shControl HFFF2 cells  
21 treated with nocodazole. HFFF2 shControl cells were infected with 1 pfu/cell of vSR27-  
22 VP26GFP at 37°C. At 6h post-infection, nocodazole was added in the cell medium at a final  
23 concentration of 10 µM. At 24h post-infection, capsid trafficking was monitored at room  
24 temperature at 1 frame/second for 60 seconds. The movie is shown at 10 frames/second.  
25 Frame is 25 µm by 28 µm.

26

27 **Supplemental Movie S4.** Capsid trafficking of vFRA $\Delta$ 37-VP26GFP in shControl HFFF2 cells  
28 at 24h post-infection. HFFF2 shControl cells were infected with 1 pfu/cell of vFRA $\Delta$ 37-  
29 VP26GFP at 37°C. At 24h post-infection, capsid trafficking was monitored at room  
30 temperature at 1 frame/second for 60 seconds. The movie is shown at 10 frames/second.  
31 Frame is 24  $\mu$ m by 17  $\mu$ m.

32

33 **Supplemental Movie S5.** Microtubules plus-end dynamics in shControl and shDyst1 cells.  
34 shControl and shDyst1 HFFF2 cells were transfected with pGFP-hEB3. 16h later, EB3  
35 fluorescence was monitored by live-cell microscopy at 37°C at 1 frame every 2 seconds for  
36 120 seconds. The movie is shown at 10 frames/second. Each frame is 140  $\mu$ m by 106  $\mu$ m.

37
